# Supplementary material
Source: Springer Nature journal article supplement (https://www.springermedizin.de/resource/supplementary/12950_2013_362_MOESM6_ESM.pdf/9557662)

## LPS

## Flagellin

## Peptidoglycan (PG)

## Porins

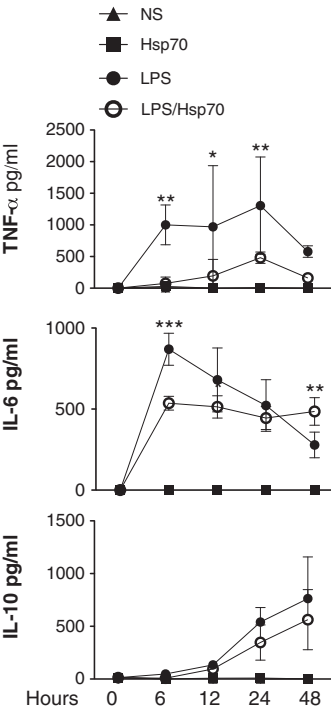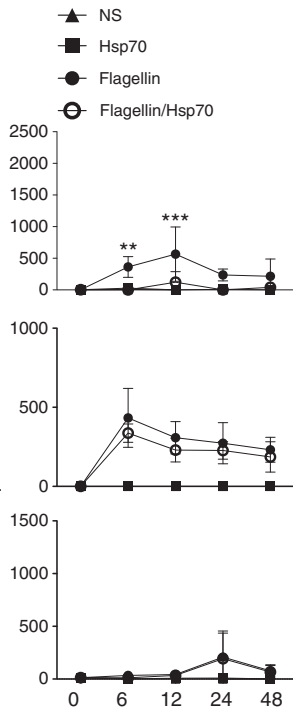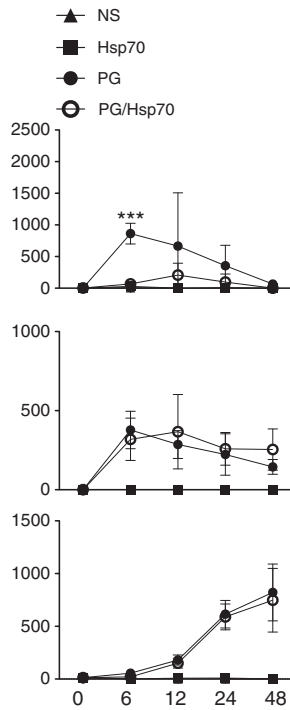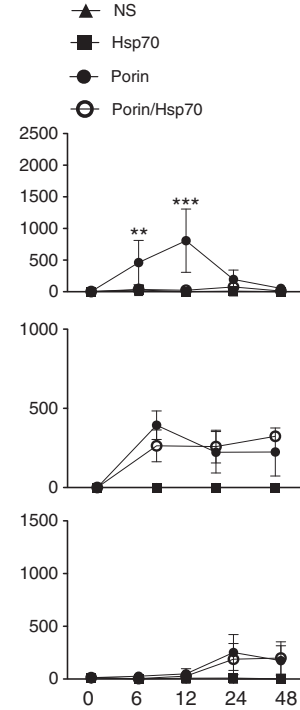

Supplement: MOESM6 [file 9557662]
